# Supplementary material
Source: PubMed Central journal article supplement (PMC3985681)
Supplement: ci400760a_si_001.pdf [file ci400760a_si_001.pdf]

## Hsp90 Inhibitors, Part 2: Combining Ligand-Based and Structure-Based Approaches for Virtual Screening Application

Antonia Caroli,<sup>§,†</sup> Flavio Ballante,<sup>§,‡</sup> Richard B. Wickersham III<sup>Δ,‡</sup>, Federico Corelli<sup>#</sup> and Rino Ragno<sup>\*,‡</sup>

<sup>†</sup>Department of Physics, Sapienza Università di Roma, P.le Aldo Moro 5, 00185, Roma, Italy.

<sup>‡</sup>Rome Center for Molecular Design, Dipartimento di Chimica e Tecnologie del Farmaco, Sapienza Università di Roma, P. le A. Moro 5, 00185 Roma, Italy.

<sup>Δ</sup>Department of Biochemistry and Molecular Biophysics, Washington University in St. Louis School of Medicine, 700 South Euclid Avenue, St. Louis, Missouri 63110, United States

<sup>#</sup>Dipartimento Farmaco Chimico Tecnologico, Università degli Studi di Siena, via A. Moro, I-53100 Siena, Italy.

<sup>§</sup>*A.C. and F.B. contributed equally to this work*

## SUPPORTING INFORMATION

### CONTENTS

|                                      |       |
|--------------------------------------|-------|
| Alignment assessment (used data set) | S2    |
| VS results                           | S3-S5 |
| Biological activity                  | S6-S7 |

**Table S1.** Data set used for LB/SB alignment assessment

| entry <sup>a</sup> | PDB<br>Code | IC <sub>50</sub><br>ATPase( $\mu$ M) | pIC <sub>50</sub> <sup>b</sup> |
|--------------------|-------------|--------------------------------------|--------------------------------|
| 1                  | 1UY8        | 75                                   | 4.12                           |
| 2                  | 1UYC        | 41                                   | 4.39                           |
| 3                  | 1UYD        | 200                                  | 3.70                           |
| 4                  | 1UYE        | 200                                  | 3.70                           |
| 5                  | 1UYG        | 53.5                                 | 4.27                           |
| 6                  | 1UYH        | 14.3                                 | 4.84                           |
| 7                  | 1UYK        | 17.1                                 | 4.77                           |
| 13                 | 2BT0        | 5.7                                  | 5.24                           |
| 14                 | 2CCS        | 8.2                                  | 5.09                           |
| 16                 | 2CCU        | 1.3                                  | 5.89                           |
| 17                 | 3B25        | 9.6                                  | 5.02                           |
| 18                 | 3B26        | 6.9                                  | 5.16                           |
| 20                 | 3B28        | 3                                    | 5.52                           |
| 21                 | 3OWB        | 0.88                                 | 6.06                           |
| 22                 | 3OWD        | 0.55                                 | 6.26                           |

<sup>a</sup>Entry numbers are referred to the original paper (Table 1)<sup>1</sup>

<sup>b</sup>pIC<sub>50</sub> = -Log [IC<sub>50</sub>ATPase( $\mu$ M) x 10<sup>-6</sup>]

<sup>1</sup>Ballante, F.; Caroli, A.; Wickersham III, R. B.; Ragno, R., Hsp90 Inhibitors (I). Definition of 3-D QSAutogrid/R Models as a Tool for Virtual Screening *Journal of Chemical Information and Modeling* 2014, <http://dx.doi.org/10.1021/ci400759t>.

**Table S2.** Top 80 compounds selected by the VS procedure from the NCI Diversity Set

| NCI ID | Autodock/3-D QSAR |          | Surflex/3-D QSAR |            | Autodock SF |                 | Final Score | Rank |
|--------|-------------------|----------|------------------|------------|-------------|-----------------|-------------|------|
|        | BC                | BC Score | MAXS             | MAXS Score | Energy BC   | Energy BC Score |             |      |
| 3364   | 7.183             | 1        | 6.577            | 22         | -10.77      | 27              | 50          | 1    |
| 177383 | 6.534             | 42       | 6.534            | 34         | -9.54       | 114             | 190         | 2    |
| 64111  | 6.394             | 82       | 6.28             | 127        | -10.27      | 52              | 261         | 3    |
| 145612 | 6.647             | 16       | 6.245            | 172        | -9.94       | 73              | 261         | 4    |
| 122140 | 6.504             | 48       | 6.486            | 45         | -9.13       | 191             | 284         | 5    |
| 109197 | 6.382             | 88       | 6.194            | 217        | -9.6        | 106             | 411         | 6    |
| 263220 | 6.173             | 259      | 6.416            | 64         | -9.74       | 89              | 412         | 7    |
| 170578 | 6.226             | 211      | 6.226            | 188        | -10.01      | 67              | 466         | 8    |
| 59620  | 6.498             | 49       | 6.168            | 239        | -9.18       | 185             | 473         | 9    |
| 70127  | 6.579             | 35       | 6.288            | 120        | -8.43       | 336             | 491         | 10   |
| 305831 | 6.012             | 429      | 6.571            | 24         | -10.29      | 50              | 503         | 11   |
| 18877  | 6.096             | 335      | 6.332            | 98         | -9.92       | 80              | 513         | 12   |
| 62914  | 6.103             | 328      | 6.829            | 3          | -8.76       | 254             | 585         | 13   |
| 90318  | 6.046             | 384      | 6.435            | 57         | -9.35       | 146             | 587         | 14   |
| 371688 | 6.334             | 112      | 6.053            | 376        | -9.47       | 124             | 612         | 15   |
| 99543  | 6.237             | 196      | 6.236            | 176        | -8.56       | 300             | 672         | 16   |
| 57725  | 6.089             | 341      | 6.315            | 110        | -8.94       | 223             | 674         | 17   |
| 93352  | 6.739             | 9        | 5.803            | 673        | -13.05      | 2               | 684         | 18   |
| 610930 | 6.498             | 50       | 6.288            | 121        | -7.84       | 525             | 696         | 19   |
| 119889 | 6.146             | 285      | 6.232            | 183        | -8.87       | 235             | 703         | 20   |
| 12363  | 5.911             | 572      | 6.335            | 97         | -10.55      | 35              | 704         | 21   |
| 99550  | 6.28              | 158      | 6.003            | 442        | -9.37       | 137             | 737         | 22   |
| 174267 | 6.506             | 47       | 6.506            | 42         | -7.5        | 650             | 739         | 23   |
| 8797   | 6.603             | 29       | 5.99             | 460        | -8.73       | 259             | 748         | 24   |
| 12181  | 6.029             | 404      | 6.128            | 290        | -9.96       | 71              | 765         | 25   |
| 159631 | 6.612             | 24       | 6.323            | 106        | -7.53       | 636             | 766         | 26   |

|        |       |     |       |     |        |     |      |    |
|--------|-------|-----|-------|-----|--------|-----|------|----|
| 62349  | 5.935 | 541 | 6.437 | 55  | -9.11  | 195 | 791  | 27 |
| 134755 | 5.929 | 551 | 6.233 | 179 | -9.98  | 70  | 800  | 28 |
| 114449 | 6.169 | 262 | 6.144 | 268 | -8.65  | 280 | 810  | 29 |
| 18312  | 6.169 | 261 | 6.271 | 135 | -8.17  | 415 | 811  | 30 |
| 77037  | 6.636 | 19  | 5.742 | 749 | -10.35 | 45  | 813  | 31 |
| 371880 | 6.069 | 359 | 6.157 | 253 | -9.03  | 211 | 823  | 32 |
| 154389 | 6.436 | 67  | 6.252 | 160 | -7.59  | 609 | 836  | 33 |
| 111326 | 6.208 | 224 | 5.899 | 567 | -10.35 | 46  | 837  | 34 |
| 371682 | 5.858 | 659 | 6.272 | 134 | -10.27 | 53  | 846  | 35 |
| 632536 | 6.466 | 57  | 6.363 | 82  | -7.34  | 719 | 858  | 36 |
| 90615  | 6.593 | 34  | 6.634 | 15  | -7.13  | 811 | 860  | 37 |
| 150817 | 5.88  | 629 | 6.581 | 21  | -9.03  | 210 | 860  | 38 |
| 69573  | 5.858 | 658 | 6.582 | 20  | -9.04  | 207 | 885  | 39 |
| 23833  | 6.353 | 101 | 6.165 | 241 | -7.76  | 547 | 889  | 40 |
| 11668  | 6.207 | 226 | 6.208 | 197 | -7.99  | 474 | 897  | 41 |
| 351123 | 6.022 | 415 | 6.325 | 105 | -8.29  | 379 | 899  | 42 |
| 32673  | 6.154 | 275 | 6.326 | 104 | -7.85  | 520 | 899  | 43 |
| 132498 | 5.997 | 449 | 6.022 | 414 | -10.46 | 40  | 903  | 44 |
| 119886 | 6.295 | 136 | 5.82  | 662 | -9.59  | 107 | 905  | 45 |
| 124029 | 5.957 | 502 | 6.083 | 348 | -10.23 | 55  | 905  | 46 |
| 123993 | 6.672 | 14  | 6.252 | 158 | -7.3   | 733 | 905  | 47 |
| 372060 | 5.696 | 899 | 6.736 | 8   | -11.54 | 10  | 917  | 48 |
| 136472 | 6.17  | 260 | 6.053 | 375 | -8.52  | 309 | 944  | 49 |
| 13726  | 5.882 | 625 | 6.125 | 292 | -10.77 | 28  | 945  | 50 |
| 45236  | 5.879 | 632 | 6.892 | 2   | -8.47  | 319 | 953  | 51 |
| 23128  | 5.697 | 892 | 6.411 | 66  | -13.14 | 1   | 959  | 52 |
| 65828  | 5.853 | 664 | 6.405 | 69  | -8.77  | 251 | 984  | 53 |
| 79563  | 6.574 | 38  | 5.747 | 742 | -9.04  | 208 | 988  | 54 |
| 82802  | 5.883 | 623 | 6.394 | 72  | -8.56  | 299 | 994  | 55 |
| 117285 | 6.212 | 217 | 5.932 | 526 | -8.76  | 255 | 998  | 56 |
| 37245  | 5.938 | 534 | 6.108 | 308 | -9.28  | 159 | 1001 | 57 |
| 118068 | 6.01  | 430 | 6.075 | 358 | -9     | 216 | 1004 | 58 |

|        |       |     |       |     |        |     |      |    |
|--------|-------|-----|-------|-----|--------|-----|------|----|
| 109593 | 5.911 | 573 | 6.519 | 39  | -8.22  | 396 | 1008 | 59 |
| 109483 | 6.392 | 83  | 6.353 | 89  | -7.06  | 839 | 1011 | 60 |
| 321578 | 6.271 | 166 | 5.834 | 648 | -9.08  | 198 | 1012 | 61 |
| 7520   | 5.925 | 561 | 6.048 | 384 | -9.92  | 79  | 1024 | 62 |
| 319440 | 5.809 | 733 | 6.416 | 65  | -8.92  | 229 | 1027 | 63 |
| 42258  | 6.21  | 221 | 5.949 | 504 | -8.54  | 305 | 1030 | 64 |
| 320870 | 6.343 | 106 | 6.344 | 93  | -7.03  | 847 | 1046 | 65 |
| 112671 | 5.738 | 840 | 6.448 | 51  | -9.3   | 155 | 1046 | 66 |
| 164460 | 6.388 | 85  | 6.535 | 33  | -6.89  | 929 | 1047 | 67 |
| 360494 | 5.941 | 527 | 6.241 | 173 | -8.36  | 358 | 1058 | 68 |
| 45208  | 5.933 | 543 | 6.284 | 123 | -8.2   | 401 | 1067 | 69 |
| 45238  | 6.56  | 40  | 5.916 | 546 | -7.98  | 481 | 1067 | 70 |
| 35949  | 6.284 | 154 | 5.83  | 652 | -8.71  | 264 | 1070 | 71 |
| 95090  | 5.793 | 760 | 6.135 | 282 | -10.76 | 29  | 1071 | 72 |
| 131612 | 5.99  | 457 | 5.879 | 603 | -11.39 | 11  | 1071 | 73 |
| 126401 | 5.942 | 523 | 6.265 | 151 | -8.21  | 400 | 1074 | 74 |
| 23173  | 6.764 | 8   | 5.886 | 589 | -7.97  | 483 | 1080 | 75 |
| 95025  | 6.126 | 305 | 6.088 | 334 | -8.07  | 448 | 1087 | 76 |
| 47949  | 6.049 | 377 | 5.89  | 580 | -9.42  | 132 | 1089 | 77 |
| 13028  | 6.108 | 326 | 6.364 | 81  | -7.41  | 682 | 1089 | 78 |
| 19976  | 5.792 | 763 | 6.142 | 271 | -10.08 | 57  | 1091 | 79 |
| 52440  | 6.38  | 89  | 6     | 447 | -7.72  | 559 | 1095 | 80 |

**Table S3.** Compounds with inhibitory activity

| # | NCI ID                                                                              | MW     | Compound color | IC50 [μM]  |     |
|---|-------------------------------------------------------------------------------------|--------|----------------|------------|-----|
| 1 | 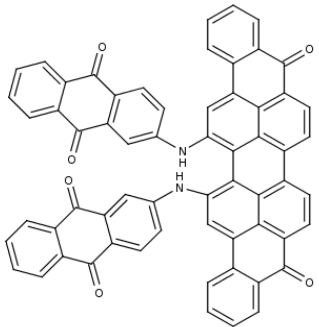   | 23128  | 899            | dark brown | 18  |
| 2 |    | 610930 | 500.51         | dark brown | 32  |
| 3 |   | 117285 | 289.25         | dark brown | 49  |
| 4 |  | 170578 | 245.25         | clear      | 63  |
| 5 |  | 95090  | 581.67         | brown      | 220 |

6

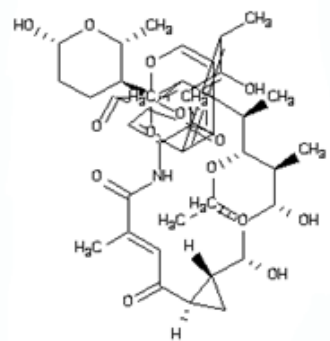

177383 822.9 dark brown 393

7

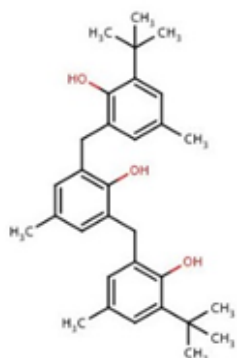

62914 460.66 clear &gt;500

8

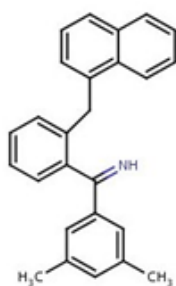

99543 349.47 yellowish &gt;500

9

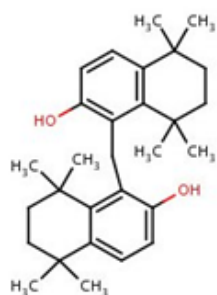

109197 420.63 clear &gt;500
